# Supplementary material
Source: ML conference proceedings conference paper supplement (https://proceedings.mlr.press/v108/cai20b.html)
Supplement: Supplementary file 1 [file cai20b-supp.pdf]

# Supplementary Materials

## 1 Preliminary lemmas

The following lemma gives some fundamental results for  $\sin \Theta(U, V)$ , which can be easily verified via definition.

**Lemma 1.** *Let  $[U, U_c]$  and  $[V, V_c]$  be two orthogonal matrices with  $U, V \in \mathbb{R}^{n \times k}$ . Then*

$$\|\sin \Theta(U, V)\|_{\text{ui}} = \|U_c^T V\|_{\text{ui}} = \|U^T V_c\|_{\text{ui}}.$$

Here  $\|\cdot\|_{\text{ui}}$  denotes any unitarily invariant norm, including the spectral norm and Frobenius norm. In particular, for the spectral norm, it holds  $\|\sin \Theta(U, V)\| = \|UU^T - VV^T\|$ ; for the Frobenius norm, it holds  $\|\sin \Theta(U, V)\|_F = \frac{1}{\sqrt{2}}\|UU^T - VV^T\|_F$ .

The following lemma is the well-known Weyl theorem, which gives the perturbation bound for eigenvalues of Hermitian matrix.

**Lemma 2.** (*Stewart and Sun, 1990, p.203*) *For two Hermitian matrices  $A, \tilde{A} \in \mathbb{C}^{n \times n}$ , let  $\lambda_1 \leq \dots \leq \lambda_n$ ,  $\tilde{\lambda}_1 \leq \dots \leq \tilde{\lambda}_n$  be eigenvalues of  $A, \tilde{A}$ , respectively. Then*

$$|\lambda_j - \tilde{\lambda}_j| \leq \|A - \tilde{A}\|, \quad \text{for } 1 \leq j \leq n.$$

The following lemma is used to establish the perturbation bound for the invariant subspace of a Hermitian matrix, which is due to Davis and Kahan.

**Lemma 3.** (*Davis and Kahan, 1970, Theorem 5.1*) *Let  $H$  and  $M$  be two Hermitian matrices, and let  $S$  be a matrix of a compatible size as determined by the Sylvester equation*

$$HY - YM = S.$$

*If either all eigenvalues of  $H$  are contained in a closed interval that contains no eigenvalue of  $M$  or vice versa, then the Sylvester equation has a unique solution  $Y$ , and moreover*

$$\|Y\|_{\text{ui}} \leq \frac{1}{\delta} \|S\|_{\text{ui}},$$

where  $\delta = \min |\lambda - \omega|$  over all eigenvalues  $\omega$  of  $M$  and all eigenvalues  $\lambda$  of  $H$ .

For a rectangular matrix  $A \in \mathbb{R}^{m \times n}$  (without loss of generality, assume  $m \geq n$ ), let the SVD of  $A$  be  $A = U\Sigma V^T$ , where  $U = [U_1 | U_2 | U_3] = [u_1, \dots, u_k | u_{k+1}, \dots, u_r | u_{r+1}, \dots, u_m] \in \mathbb{R}^{m \times m}$ ,  $V = [V_1 | V_2 | V_3] = [v_1, \dots, v_k | v_{k+1}, \dots, v_r | v_{r+1}, \dots, v_n] \in \mathbb{R}^{n \times n}$  are orthogonal matrices, and  $\Sigma = \begin{bmatrix} \text{diag}(\Sigma_1, \Sigma_2) & 0_{r \times (n-r)} \\ 0_{(m-r) \times r} & 0_{(m-r) \times (n-r)} \end{bmatrix}$ ,  $\Sigma_1 = \text{diag}(\sigma_1, \dots, \sigma_k)$ ,  $\Sigma_2 = \text{diag}(\sigma_{k+1}, \dots, \sigma_r)$  with  $\sigma_1 \geq \dots \geq \sigma_r > 0$ ,  $k \leq r = \text{rank}(A)$ . Then the spectral decomposition of  $\begin{bmatrix} 0 & A \\ A^T & 0 \end{bmatrix}$  can be given by

$$\begin{bmatrix} 0 & A \\ A^T & 0 \end{bmatrix} = X \text{diag}(\Sigma_1, \Sigma_2, -\Sigma_1, -\Sigma_2, 0_{n-r}, 0_{m-r}) X^T, \quad (1)$$

where  $X = \frac{1}{\sqrt{2}} \begin{bmatrix} U & -U & 0 & \sqrt{2}U_3 \\ V & V & \sqrt{2}V_3 & 0 \end{bmatrix}$  is an orthogonal matrix.

With the help of (1) and Lemmas 2 and 3, we are able to prove Lemma 4, which established an error bound for singular vectors.

**Lemma 4.** *Given  $A \in \mathbb{R}^{m \times n}$  ( $m \geq n$ ), let the SVD of  $A$  be given as above. Let  $\hat{\sigma}_j, \hat{u}_j, \hat{v}_j$  be respectively the approximate singular values, right and left singular vectors of  $A$  satisfying that  $\hat{U} = [\hat{u}_1, \dots, \hat{u}_k] \in \mathbb{R}^{m \times k}$  and  $\hat{V} = [\hat{v}_1, \dots, \hat{v}_k] \in \mathbb{R}^{n \times k}$  are both orthonormal,  $\hat{\Sigma} = \hat{U}^T A \hat{V} = \text{diag}(\hat{\sigma}_1, \dots, \hat{\sigma}_k)$  with  $\hat{\sigma}_1 \geq \dots \geq \hat{\sigma}_k > 0$ . Let*

$$E = A\hat{V} - \hat{U}\hat{\Sigma}, \quad F = A^T\hat{U} - \hat{V}\hat{\Sigma}. \quad (2)$$

If

$$\|(I_m - \hat{U}\hat{U}^T)A(I_n - \hat{V}\hat{V}^T)\| < \hat{\sigma}_k, \quad \max\{\|E\|, \|F\|\} < \sigma_k - \sigma_{k+1},$$

then

$$\max\{\Theta_u, \Theta_v\} \leq \eta, \quad \frac{\|U_1 \Sigma_1 V_1^T - \hat{U} \hat{\Sigma} \hat{V}^T\|_{\max}}{\|A\|} \leq (\|U_1\|_{2,\infty} \Theta_v + \|V_1\|_{2,\infty} \Theta_u) + (1 + 3\|U_1\|_{2,\infty} \|V_1\|_{2,\infty}) \Theta_u \Theta_v,$$

where  $\Theta_u = \|\sin \Theta(U_1, \hat{U})\|$ ,  $\Theta_v = \|\sin \Theta(V_1, \hat{V})\|$ ,  $\eta = \frac{\max\{\|E\|, \|F\|\}}{\sigma_k - \sigma_{k+1} - \max\{\|E\|, \|F\|\}}$ .

*Proof.* Let

$$\begin{aligned} H &= \begin{bmatrix} 0 & A \\ A^T & 0 \end{bmatrix}, & X_1 &= \frac{1}{\sqrt{2}} \begin{bmatrix} U_1 & -U_1 \\ V_1 & V_1 \end{bmatrix}, \\ \hat{X}_1 &= \frac{1}{\sqrt{2}} \begin{bmatrix} \hat{U} & -\hat{U} \\ \hat{V} & \hat{V} \end{bmatrix}, & X_2 &= \frac{1}{\sqrt{2}} \begin{bmatrix} U_2 & -U_2 & 0 & \sqrt{2}U_3 \\ V_2 & V_2 & \sqrt{2}V_3 & 0 \end{bmatrix}. \end{aligned}$$

By calculations, we have

$$\|X_1 X_1^T - \hat{X}_1 \hat{X}_1^T\|_{\text{ui}} = \|\text{diag}(U_1 U_1^T - \hat{U} \hat{U}^T, V_1 V_1^T - \hat{V} \hat{V}^T)\|_{\text{ui}} \quad (3)$$

By simple calculations, we have

$$H \hat{X}_1 - \hat{X}_1 \text{diag}(\hat{\Sigma}, -\hat{\Sigma}) = \frac{1}{\sqrt{2}} \begin{bmatrix} A \hat{V} - \hat{U} \hat{\Sigma} & A \hat{V} - \hat{U} \hat{\Sigma} \\ A^T \hat{U} - \hat{V} \hat{\Sigma} & -A^T \hat{U} + \hat{V} \hat{\Sigma} \end{bmatrix} = \frac{1}{\sqrt{2}} \begin{bmatrix} E & E \\ F & -F \end{bmatrix} \triangleq R, \quad (4a)$$

$$H X_2 - X_2 \text{diag}(\Sigma_2, -\Sigma_2, 0, 0) = 0, \quad (4b)$$

where (4a) uses (2), (4b) uses the SVD of  $A$ . Then it follows from (4a) that

$$\|R\| = \left\| \text{diag}(E, F) \frac{1}{\sqrt{2}} \begin{bmatrix} I_k & I_k \\ I_k & -I_k \end{bmatrix} \right\| = \|\text{diag}(E, F)\| = \max\{\|E\|, \|F\|\}. \quad (5)$$

Pre-multiplying (4a) by  $X_2^T$  and using (4b), we have

$$X_2^T R = X_2^T H \hat{X}_1 - X_2^T \hat{X}_1 \text{diag}(\hat{\Sigma}, -\hat{\Sigma}) = \text{diag}(\Sigma_2, -\Sigma_2, 0, 0) X_2^T \hat{X}_1 - X_2^T \hat{X}_1 \text{diag}(\hat{\Sigma}, -\hat{\Sigma}). \quad (6)$$

To apply Lemma 3 to (6), we need to estimate the gap between the eigenvalues of  $\text{diag}(\hat{\Sigma}, -\hat{\Sigma})$  and those of  $\text{diag}(\Sigma_2, -\Sigma_2, 0, 0)$ . Using (4a) and  $\hat{U}^T A \hat{V} = \hat{\Sigma}$ , we have

$$(H - R \hat{X}_1^T - \hat{X}_1 R^T) \hat{X}_1 = H \hat{X}_1 - R = \hat{X}_1 \text{diag}(\hat{\Sigma}, -\hat{\Sigma}), \quad (7)$$

which implies that  $\pm \hat{\sigma}_j$  are eigenvalues of  $H - R \hat{X}_1^T - \hat{X}_1 R^T$ , and the corresponding eigenvectors are  $\frac{1}{\sqrt{2}} \begin{bmatrix} \pm \hat{u}_j \\ \hat{v}_j \end{bmatrix}$ , for  $j = 1, \dots, k$ . Next, we declare that  $\hat{\sigma}_1, \dots, \hat{\sigma}_k$  are the  $k$  largest eigenvalues of  $H - R \hat{X}_1^T - \hat{X}_1 R^T$ . This is because

$$\begin{aligned} & \max_{\hat{X}_1^T x=0} \frac{x^T (H - R \hat{X}_1^T - \hat{X}_1 R^T) x}{x^T x} \\ & \leq \|(I - \hat{X}_1 \hat{X}_1^T)(H - R \hat{X}_1^T - \hat{X}_1 R^T)(I - \hat{X}_1 \hat{X}_1^T)\| \\ & = \|(I - \hat{X}_1 \hat{X}_1^T) H (I - \hat{X}_1 \hat{X}_1^T)\| \\ & = \left\| \begin{bmatrix} I_m - \hat{U} \hat{U}^T & 0 \\ 0 & I_n - \hat{V} \hat{V}^T \end{bmatrix} \begin{bmatrix} 0 & A \\ A^T & 0 \end{bmatrix} \begin{bmatrix} I_m - \hat{U} \hat{U}^T & 0 \\ 0 & I_n - \hat{V} \hat{V}^T \end{bmatrix} \right\| \\ & = \|(I_m - \hat{U} \hat{U}^T) A (I_n - \hat{V} \hat{V}^T)\| < \hat{\sigma}_k. \end{aligned}$$

Therefore, by Lemma 2, we have

$$|\sigma_j - \hat{\sigma}_j| \leq \|R\hat{X}_1^T + \hat{X}_1 R^T\|, \quad \text{for } j = 1, \dots, k. \quad (8)$$

Together with (5), we get

$$\begin{aligned} |\sigma_j - \hat{\sigma}_j| &\leq \|R\hat{X}_1^T + \hat{X}_1 R^T\| = \max_j |\lambda_j([R, \hat{X}_1] \begin{bmatrix} \hat{X}_1^T \\ R^T \end{bmatrix})| = \max_j |\lambda_j(\begin{bmatrix} \hat{X}_1^T \\ R^T \end{bmatrix} [R, \hat{X}_1])| \\ &= \max_j |\lambda_j(\begin{bmatrix} 0 & I_k \\ R^T R & 0 \end{bmatrix})| = \|R\| = \max\{\|E\|, \|F\|\}. \end{aligned} \quad (9)$$

Here we use the property that for any two matrix  $A \in \mathbb{R}^{m \times n}$ ,  $B \in \mathbb{R}^{n \times m}$ , the nonzero eigenvalues of  $AB$  and  $BA$  are the same.

Now by the assumption that  $\max\{\|E\|, \|F\|\} < \sigma_k - \sigma_{k+1}$ , we have

$$\hat{\sigma}_k - \sigma_{k+1} = \sigma_k - \sigma_{k+1} + \hat{\sigma}_k - \sigma_k \geq \sigma_k - \sigma_{k+1} - \max\{\|E\|, \|F\|\} > 0, \quad (10)$$

therefore, the eigenvalues of  $\text{diag}(\Sigma_2, -\Sigma_2, 0, 0)$  lie in  $[-\sigma_{k+1}, \sigma_{k+1}]$ , which has no eigenvalues of  $\text{diag}(\hat{\Sigma}, -\hat{\Sigma})$ . We are able to apply Lemma 3 to (6), which yields

$$\|X_2^T \hat{X}_1\|_{\text{ui}} \leq \frac{\|X_2^T R\|_{\text{ui}}}{\sigma_k - \sigma_{k+1} - \max\{\|E\|, \|F\|\}}. \quad (11)$$

Using (3), Lemma 1, (10) and (11), we get

$$\max\{\Theta_u, \Theta_v\} = \|\sin \Theta(X_1, \hat{X}_1)\| = \|X_2^T \hat{X}_1\| \leq \frac{\|X_2^T R\|}{\sigma_k - \sigma_{k+1} - \max\{\|E\|, \|F\|\}} \leq \eta. \quad (12)$$

Let

$$\hat{U} = U\Gamma_u = [U_1, U_2, U_3] \begin{bmatrix} \Gamma_{u1} \\ \Gamma_{u2} \\ \Gamma_{u3} \end{bmatrix}, \quad \hat{V} = V\Gamma_v = [V_1, V_2, V_3] \begin{bmatrix} \Gamma_{v1} \\ \Gamma_{v2} \\ \Gamma_{v3} \end{bmatrix}, \quad (13)$$

where  $\Gamma_{u1} \in \mathbb{R}^{k \times k}$ ,  $\Gamma_{u2} \in \mathbb{R}^{(r-k) \times k}$ ,  $\Gamma_{u3} \in \mathbb{R}^{(m-r) \times k}$ ,  $\Gamma_{v1} \in \mathbb{R}^{k \times k}$ ,  $\Gamma_{v2} \in \mathbb{R}^{(r-k) \times k}$ ,  $\Gamma_{v3} \in \mathbb{R}^{(n-r) \times k}$ , and  $\begin{bmatrix} \Gamma_{u1} \\ \Gamma_{u2} \\ \Gamma_{u3} \end{bmatrix}$ ,  $\begin{bmatrix} \Gamma_{v1} \\ \Gamma_{v2} \\ \Gamma_{v3} \end{bmatrix}$  are both orthonormal. By (12), we have

$$\left\| \begin{bmatrix} \Gamma_{u2} \\ \Gamma_{u3} \end{bmatrix} \right\| = \Theta_u, \quad \sigma_{\min}(\Gamma_{u1}) = \sqrt{1 - \Theta_u^2}, \quad \left\| \begin{bmatrix} \Gamma_{v2} \\ \Gamma_{v3} \end{bmatrix} \right\| = \Theta_v, \quad \sigma_{\min}(\Gamma_{v1}) = \sqrt{1 - \Theta_v^2}. \quad (14)$$

Substituting (13) into  $\hat{U}^T A \hat{V} = \hat{\Sigma}$  and using the SVD of  $A$ , we have

$$\hat{\Sigma} = [\Gamma_{u1}^T, \Gamma_{u2}^T, \Gamma_{u3}^T] \text{diag}(\Sigma_1, \Sigma_2, 0_{(m-r) \times (n-r)}) \begin{bmatrix} \Gamma_{v1} \\ \Gamma_{v2} \\ \Gamma_{v3} \end{bmatrix} = \Gamma_{u1}^T \Sigma_1 \Gamma_{v1} + \Gamma_{u2}^T \Sigma_2 \Gamma_{v2}. \quad (15)$$

Then it follows that

$$\begin{aligned} \|\Sigma_1 - \Gamma_{u1} \hat{\Sigma} \Gamma_{v1}^T\| &= \|(\Sigma_1 - \Gamma_{u1} \Gamma_{u1}^T \Sigma_1) + (\Gamma_{u1} \Gamma_{u1}^T \Sigma_1 - \Gamma_{u1} \Gamma_{u1}^T \Sigma_1 \Gamma_{v1} \Gamma_{v1}^T) - \Gamma_{u1} \Gamma_{u2}^T \Sigma_2 \Gamma_{v2} \Gamma_{v1}^T\| \\ &\leq \|I - \Gamma_{u1} \Gamma_{u1}^T\| \|\Sigma_1\| + \|\Gamma_{u1} \Gamma_{u1}^T\| \|I - \Gamma_{v1} \Gamma_{v1}^T\| \|\Sigma_1\| + \|\Gamma_{u2}\| \|\Gamma_{v2}\| \|\Sigma_2\| \\ &\leq (\Theta_u^2 + \Theta_v^2 + \Theta_u \Theta_v) \|\Sigma_1\|. \end{aligned} \quad (16)$$

Finally, using (14), (15), (16) and  $\|\Gamma_{u1}\| \leq 1$ ,  $\|\Gamma_{v1}\| \leq 1$ ,  $\|\widehat{\Sigma}\| \leq \|A\|$ , we have

$$\begin{aligned}
\|U_1 \Sigma_1 V_1^T - \widehat{U} \widehat{\Sigma} \widehat{V}^T\|_{\max} &= \max_{i,j} |e_i^T (U_1 \Sigma_1 V_1^T - \widehat{U} \widehat{\Sigma} \widehat{V}^T) e_j| \\
&= \max_{i,j} |e_i^T (U_1 \Sigma_1 V_1^T - U \Gamma_u \widehat{\Sigma} \Gamma_v^T V^T) e_j| \\
&\leq \max_{i,j} |e_i^T (U_1 \Sigma_1 V_1^T - U_1 \Gamma_{u1} \widehat{\Sigma} \Gamma_{v1}^T V_1^T) e_j| + \|[U_2, U_3] \begin{bmatrix} \Gamma_{u2} \\ \Gamma_{u3} \end{bmatrix} \widehat{\Sigma} \begin{bmatrix} \Gamma_{v2} \\ \Gamma_{v3} \end{bmatrix}^T [V_2, V_3]^T\| \\
&\quad + \max_{i,j} \left( |e_i^T [U_2, U_3] \begin{bmatrix} \Gamma_{u2} \\ \Gamma_{u3} \end{bmatrix} \widehat{\Sigma} \Gamma_{v1}^T V_1^T e_j| + |e_i^T U_1 \Gamma_{u1} \widehat{\Sigma} \begin{bmatrix} \Gamma_{v2} \\ \Gamma_{v3} \end{bmatrix}^T [V_2, V_3]^T e_j| \right) \\
&\leq \max_{i,j} (3 \|e_i^T U_1\| \|e_j^T V_1\| \|A\| \Theta_u \Theta_v + \|A\| \Theta_u \Theta_v + \|e_j^T V_1\| \|A\| \Theta_u + \|e_i^T U_1\| \|A\| \Theta_v) \\
&\leq \|A\| ((\|U_1\|_{2,\infty} \Theta_v + \|V_1\|_{2,\infty} \Theta_u) + (1 + 3\|U_1\|_{2,\infty} \|V_1\|_{2,\infty}) \Theta_u \Theta_v),
\end{aligned}$$

completing the proof.  $\square$

**Lemma 5.** (Tropp, 2015, Corollary 6.1.2) Let  $\mathbf{S}_1, \dots, \mathbf{S}_n$  be independent random matrices with common dimension  $d_1 \times d_2$ , and assume that each matrix has uniformly bounded deviation from its mean:

$$\|\mathbf{S}_k - \mathbb{E}(\mathbf{S}_k)\| \leq L, \quad \text{for each } k = 1, \dots, n.$$

Let  $\mathbf{Z} = \sum_{k=1}^n \mathbf{S}_k$ ,  $v(\mathbf{Z})$  denote the matrix covariance statistic of the sum:

$$\begin{aligned}
v(\mathbf{Z}) &= \max\{\|\mathbb{E}[(\mathbf{Z} - \mathbb{E}(\mathbf{Z}))(\mathbf{Z} - \mathbb{E}(\mathbf{Z}))^H]\|, \|\mathbb{E}[(\mathbf{Z} - \mathbb{E}(\mathbf{Z}))^H(\mathbf{Z} - \mathbb{E}(\mathbf{Z}))]\|\} \\
&= \max\{\|\mathbb{E}[\sum_{k=1}^n (\mathbf{S}_k - \mathbb{E}(\mathbf{S}_k))(\mathbf{S}_k - \mathbb{E}(\mathbf{S}_k))^H]\|, \|\mathbb{E}[\sum_{k=1}^n (\mathbf{S}_k - \mathbb{E}(\mathbf{S}_k))^H(\mathbf{S}_k - \mathbb{E}(\mathbf{S}_k))]\|\}.
\end{aligned}$$

Then for all  $t \geq 0$ ,

$$\mathbb{P}\{\|\mathbf{Z} - \mathbb{E}(\mathbf{Z})\| \geq t\} \leq (d_1 + d_2) \cdot \exp\left(\frac{-t^2/2}{v(\mathbf{Z}) + Lt/3}\right).$$

**Lemma 6.** For any linear homogeneous function  $F: \mathbb{R}^k \rightarrow \mathbb{R}^{m \times n}$ , assume that the linear system of equations  $F(x) = C$  either has a unique solution or has no solution at all. Then it holds

$$\operatorname{argmin}_x \|F(x) - C\| = \operatorname{argmin}_x \|F(x) - C\|_F.$$

*Proof.* For any  $A, B \in \mathbb{R}^{m \times n}$ , define  $\langle A, B \rangle = \operatorname{trace}(A^T B)$ . It is easy to see that  $\langle \cdot, \cdot \rangle$  is an inner product over  $\mathbb{R}^{m \times n}$ . Denote the range space of  $F(\cdot)$  by  $\mathcal{F}$ , and its orthogonal complement space by  $\mathcal{F}^\perp$ . Write  $C = C_{\text{LS}} + C$  such that  $C_{\text{LS}} \in \mathcal{F}$ , and  $C \in \mathcal{F}^\perp$ . Then the solutions to  $\min \|F(x) - C\|$  and  $\min \|F(x) - C\|_F$  are nothing but the solutions to  $F(x) = C_{\text{LS}}$ . Since  $C_{\text{LS}} \in \mathcal{F}$ ,  $F(x) = C_{\text{LS}}$  has at least a solution. By the assumption, the solution should be unique. The proof is completed.  $\square$

**Lemma 7.** Let  $L_* \in \mathbb{R}^{m \times n}$  with  $m \geq n$ , let the SVD of  $L_*$  be  $L_* = U_* \Sigma_* V_*^T$ , where  $U_* \in \mathbb{R}^{m \times r}$ ,  $V_* \in \mathbb{R}^{n \times r}$  are orthonormal,  $\Sigma_* = \operatorname{diag}(\sigma_{1*}, \dots, \sigma_{r*})$  with  $\sigma_{1*} \geq \dots \geq \sigma_{r*} > 0$ . Let  $G \in \mathbb{R}^{m \times n}$  be a perturbation to  $L_*$ ,  $X \in \mathbb{R}^{m \times r}$ ,  $Y \in \mathbb{R}^{n \times r}$  have full column rank. Denote  $\theta_x = \|\sin \Theta(U_*, X)\|$ ,  $\theta_y = \|\sin \Theta(V_*, Y)\|$ . Then

$$\min_{X,Y} \|L_* - G - XY^T\| \geq \sigma_{r*} \max\{\sqrt{1 - \theta_x^2} \theta_y, \sqrt{1 - \theta_y^2} \theta_x\} \sqrt{1 - \theta_x^2} \sqrt{1 - \theta_y^2} - \|G\|.$$

*Proof.* Let  $U_{*,c}$ ,  $V_{*,c}$  be such that  $U = [U_*, U_{*,c}]$ ,  $V = [V_*, V_{*,c}]$  are orthogonal. Let  $\widehat{X} = U_* C_x + U_{*,c} S_x$ ,  $\widehat{Y} = V_* C_y + V_{*,c} S_y$ , where the columns of  $\widehat{X}$ ,  $\widehat{Y}$  form the orthonormal basis for  $\mathcal{R}(X)$  and  $\mathcal{R}(Y)$ , respectively,  $C_x^T C_x + S_x^T S_x = I_r$ ,  $C_y^T C_y + S_y^T S_y = I_r$ . By Lemma 1, we know that  $\|S_x\| = \theta_x$ ,  $\|S_y\| = \theta_y$ .

Noticing that

$$\begin{aligned}
\min_{X,Y} \|L_* - XY^T\|^2 &= \min_D \|U^T L_* V - U^T \widehat{X} \widehat{Y}^T V\|^2 = \min_D \left\| \begin{bmatrix} \Sigma_1 & 0 \\ 0 & 0 \end{bmatrix} - \begin{bmatrix} C_x \\ S_x \end{bmatrix} D [C_y^T, S_y^T] \right\|^2 \\
&= \left\| \begin{bmatrix} \Sigma_1 & 0 \\ 0 & 0 \end{bmatrix} - \begin{bmatrix} C_x \\ S_x \end{bmatrix} [C_x, S_x]^T \begin{bmatrix} \Sigma_1 & 0 \\ 0 & 0 \end{bmatrix} \begin{bmatrix} C_y \\ S_y \end{bmatrix} [C_y^T, S_y^T] \right\|^2,
\end{aligned}$$

we have

$$\begin{aligned}
\min_{X,Y} \|L_* - XY^T\|^2 &\geq \max \left\{ \left\| C_x [C_x, S_x]^T \begin{bmatrix} \Sigma_1 & 0 \\ 0 & 0 \end{bmatrix} \begin{bmatrix} C_y \\ S_y \end{bmatrix} S_y^T \right\|^2, \left\| S_x [C_x, S_x]^T \begin{bmatrix} \Sigma_1 & 0 \\ 0 & 0 \end{bmatrix} \begin{bmatrix} C_y \\ S_y \end{bmatrix} C_y^T \right\|^2 \right\} \\
&\geq \max \{ \sigma_{\min}^2(C_x) \|S_y\|^2, \sigma_{\min}^2(C_y) \|S_x\|^2 \} \sigma_{\min}^2 \left( [C_x, S_x]^T \begin{bmatrix} \Sigma_1 & 0 \\ 0 & 0 \end{bmatrix} \begin{bmatrix} C_y \\ S_y \end{bmatrix} \right) \\
&\geq \max \{ (1 - \theta_x^2) \theta_y^2, (1 - \theta_y^2) \theta_x^2 \} (\sigma_{r*} \sqrt{1 - \theta_x^2} \sqrt{1 - \theta_y^2})^2
\end{aligned}$$

Combining it with the fact that  $\|L_* - G - XY^T\| \geq \|L_* - XY^T\| - \|G\|$  for any  $X, Y$ , we get the conclusion.  $\square$

**Lemma 8.** Let  $L_*$ ,  $G$  be the same as in Lemma 7. Let  $X = (L_* - G)Y$ , where  $Y \in \mathbb{R}^{n \times r}$  is orthonormal. Denote  $\theta_x = \|\sin \Theta(U_*, X)\|$ ,  $\theta_y = \|\sin \Theta(V_*, Y)\|$ . If  $\|G\| < \sigma_{r*} \sqrt{1 - \theta_y^2}$ , then

$$\sigma_r(X) \geq \sigma_{r*} \sqrt{1 - \theta_y^2} - \|G\|, \quad \theta_x \leq \frac{\|G\|}{\sigma_r \sqrt{1 - \theta_y^2} - \|G\|}.$$

*Proof.* By Lemma 2 and Lemma 1, we have

$$\begin{aligned}
\sigma_r(X) &= \sigma_r((L_* - G)Y) \geq \sigma_r(L_* Y) - \|GY\| \geq \sigma_r(\Sigma_* V_*^T Y) - \|G\| \geq \sigma_{r*} \sigma_{\min}(V_*^T Y) - \|G\| \\
&= \sigma_{r*} \sigma_{\min}^{\frac{1}{2}}(Y^T V_* V_*^T Y) - \|G\| \geq \sigma_{r*} \sigma_{\min}^{\frac{1}{2}}(I_r - Y^T(I - V_* V_*^T)Y) - \|G\| \\
&= \sigma_{r*} \sqrt{1 - \|(I - V_* V_*^T)Y\|^2} - \|G\| = \sigma_{r*} \sqrt{1 - \theta_y^2} - \|G\| > 0.
\end{aligned} \tag{17}$$

Therefore,  $X$  has full column rank. Denote  $G_x = (X^T X)^{-\frac{1}{2}}$ ,  $\hat{X} = X G_x$ . Then  $\hat{X}$  and  $X = AY$  can be rewritten as  $\hat{X} = AY G_x$ . Using Lemma 1 and (17), we have

$$\| \theta_x \| = \| U_{*,c}^T \hat{X} \| = \| U_{*,c}^T (L_* - G) Y G_x \| \leq \| G Y G_x \| \leq \| G \| \| G_x \| \leq \frac{\| G \|}{\sigma_r(X)} \leq \frac{\| G \|}{\sigma_{r*} \sqrt{1 - \theta_y^2} - \| G \|}.$$

The proof is completed.  $\square$

**Lemma 9.** Let  $U, X \in \mathbb{R}^{m \times r}$  both have orthonormal columns. It holds  $\|X\|_{2,\infty} \leq \|U\|_{2,\infty} + \|\sin \Theta(U, X)\|$ .

*Proof.* Let  $U_c$  be such that  $[U, U_c]$  is an orthogonal matrix. We can write  $X = UC_x + U_c S_x$ , where  $C_x^T C_x + S_x^T S_x = I_r$ . By Lemma 1, we have  $\|\sin \Theta(U, X)\| = \|U_c^T X\| = \|S_x\|$ . Then for any  $1 \leq i \leq m$ , we have

$$\|e_i^T X\| = \|e_i^T UC_x + e_i^T U_c S_x\| \leq \|e_i^T U\| + \|S_x\|,$$

the conclusion follows.  $\square$

**Lemma 10.** (Jain and Netrapalli, 2015, Lemmas 8,10) Let  $A \in \mathbb{R}^{m \times n}$  with  $m \geq n$ . Suppose  $\Omega$  is obtained by sampling each entry of  $A$  with probability  $p \in [\frac{1}{4m}, 0.5]$ . Then w.p.  $\geq 1 - 1/m^{10+\log \alpha}$ ,

$$\left\| \frac{1}{p} \Pi_\Omega(A) - A \right\| \leq \frac{6\sqrt{\alpha m}}{\sqrt{p}} \|A\|_{\max}.$$

## 2 Proof for Main Theorems

### 2.1 Proof of Theorem 1

**Proof of Theorem 1.** First, it holds  $\|(I - U_* U_*^T)M(I - V_* V_*^T)\| = \|(I - U_* U_*^T)S_*(I - V_* V_*^T)\|$ . Then by assumption, we have  $\|(I - U_* U_*^T)M(I - V_* V_*^T)\| < \sigma_{r*}$ .

Second, we have

$$\begin{aligned}\|E\| &= \|MV_* - U_*\Sigma_*\| = \|L_*V_* - U_*\Sigma_* + S_*V_*\| = \|S_*V_*\|, \\ \|F\| &= \|M^T U_* - V_*\Sigma_*\| = \|L_*^T U_* - V_*\Sigma_* + S_*^T U_*\| = \|S_*^T U_*\|.\end{aligned}$$

It follows

$$\max\{\|E\|, \|F\|\} = \max\{\|S_*V_*\|, \|S_*^T U_*\|\} < \sigma_r - \sigma_{r+1}.$$

Then applying Lemma 4 gives the conclusion.  $\square$

## 2.2 Proof of Theorem 2

Throughout the rest of this section, we follow the notations in Algorithm 1. Besides that, we will also adopt the following notations. Denote

$$r = \text{rank}(L_*), \quad \kappa_* = \kappa_2(L_*), \quad p' = p(1 - \varrho), \quad \Omega_t = \Omega / \text{supp}(S_t), \quad G_t = S_t - S_*. \quad (18)$$

The SVDs of  $L_*$  is given by

$$L_* = [U_*, U_{*,c}] \text{diag}(\Sigma_*, 0) [V_*, V_{*,c}]^T, \quad (19)$$

where  $[U_*, U_{*,c}]$  and  $[V_*, V_{*,c}]$  are orthogonal matrices  $U_* \in \mathbb{R}^{m \times r}$  and  $V_* \in \mathbb{R}^{n \times r}$ ,  $\Sigma_* = \text{diag}(\sigma_{1*}, \dots, \sigma_{r*})$  with  $\sigma_{1*} \geq \dots \geq \sigma_{r*} > 0$ . Further denote

$$\theta_{x,t} = \|\sin \Theta(U_*, X_t)\|, \quad \theta_{y,t} = \|\sin \Theta(V_*, Y_t)\|. \quad (20)$$

**Lemma 11.**  $\|S_t - S_*\|_{\max} \leq 2\|\Pi_\Omega(X_t \Sigma_t Y_t^T - L_*)\|_{\max}$  for  $t = 0, 1, \dots$ .

*Proof.* Denote  $\Phi_* = \text{supp}(S_*)$ ,  $\Phi_t = \text{supp}(S_t)$ , it is obvious that  $S_t - S_*$  is supported on  $\Phi_t \cup \Phi_*$  and  $\Phi_t \cup \Phi_* \subset \Omega$ . Now we claim that

$$\|\Pi_\Omega(S_t - S_*)\|_{\max} \leq 2\|\Pi_\Omega(X_t \Sigma_t Y_t^T - L_*)\|_{\max}.$$

To show the claim, it suffices to consider the following two cases.

**Case (1)** For any  $(i, j) \in \Phi_t$ , it holds  $(S_t)_{(i,j)} = (L_* + S_* - X_t \Sigma_t Y_t^T)_{(i,j)}$ . Then it follows that

$$|(S_t - S_*)_{(i,j)}| = |(L_* - X_t \Sigma_t Y_t^T)_{(i,j)}| \leq \|\Pi_\Omega(X_t \Sigma_t Y_t^T - L_*)\|_{\max}.$$

**Case (2)** For any  $(i, j) \in \Phi_* \setminus \Phi_t$ , it holds  $(S_t)_{(i,j)} = 0$ . If  $|(S_t - S_*)_{(i,j)}| = |(S_*)_{(i,j)}| > 2\|\Pi_\Omega(X_t \Sigma_t Y_t^T - L_*)\|_{\max}$ , then

$$|(L_* + S_* - X_t \Sigma_t Y_t^T)_{(i,j)}| > \|\Pi_\Omega(L_* - X_t \Sigma_t Y_t^T)\|_{\max}.$$

Noticing that  $S_*$  only changes  $s$  entries of  $\Pi_\Omega(L_* - X_t \Sigma_t Y_t^T)$ , we know that the  $(i, j)$  entry of  $|\Pi_\Omega(L_* + S_* - X_t \Sigma_t Y_t^T)|$  is larger than the  $(s+1)$ st largest entry of  $|\Pi_\Omega(L_* + S_* - X_t \Sigma_t Y_t^T)|$ . This contradicts with  $(i, j) \notin \Phi_t$ .  $\square$

**Lemma 12.** Assume (A1). Denote  $r'_s = \frac{\|S_0 - S_*\|_F^2}{\|S_0 - S_*\|^2}$ . Let  $S_0$  be obtained as in Algorithm 1. It holds

$$\|S_0 - S_*\| \leq 2\sqrt{\frac{2\varrho p}{r'_s} \mu r} \|L_*\|.$$

*Proof.* First, for any  $i, j$ , we have  $L_{ij} = e_i^T U_* \Sigma_* V_*^T e_j$ . Using (A1), we have

$$|L_{ij}| \leq \|e_i^T U_*\| \|\Sigma_*\| \|e_j^T V_*\| \leq \frac{\mu r}{\sqrt{mn}} \|L_*\|,$$

and hence

$$\|L_*\|_{\max} \leq \frac{\mu r}{\sqrt{mn}} \|L_*\|. \quad (21)$$

By Lemma 11, we have

$$\|S_0 - S_*\|_{\max} \leq 2\|\Pi_{\Omega}(L_*)\|_{\max} \leq \frac{2\mu r}{\sqrt{mn}}\|L_*\|. \quad (22)$$

Therefore, using (21), (22) and (A2), we have

$$\|S_0 - S_*\|_F \leq \sqrt{2s}\|S_0 - S_*\|_{\max} \leq 2\sqrt{2s}\|\Pi_{\Omega}(L_*)\|_{\max} \leq 2\sqrt{2s}\|L_*\|_{\max} \leq 2\sqrt{2\varrho p\mu r}\|L_*\|. \quad (23)$$

By the definition of  $r'_s$ , it follows that

$$\|S_0 - S_*\| \leq \frac{\|S_0 - S_*\|_F}{\sqrt{r'_s}} \leq 2\sqrt{\frac{2\varrho p}{r'_s}}\mu r\|L_*\|.$$

The proof is completed.  $\square$

**Proof of Theorem 2.** By (A3), Lemma 10 and (21), w.p.  $\geq 1 - 1/m^{10+\log \alpha}$ , it holds

$$\|\frac{1}{p'}\Pi_{\Omega_0}(L_*) - L_*\| \leq \frac{6\sqrt{\alpha m}}{\sqrt{p'}}\|L_*\|_{\max} \leq \xi\mu r\|L_*\|. \quad (24)$$

Using Lemma 12 and (24), we have w.p.  $\geq 1 - 1/m^{10+\log \alpha}$ ,

$$\|\frac{1}{p'}\Pi_{\Omega_0}(M - S_0) - L_*\| \leq \|\frac{1}{p'}\Pi_{\Omega_0}(L_*) - L_*\| + \frac{1}{p'}\|S_0 - S_*\| \leq (\xi + \gamma)\mu r\|L_*\|. \quad (25)$$

Let the SVD of  $X_1^T L_* Y_1$  be  $X_1^T L_* Y_1 = P\tilde{\Sigma}Q^T$ , where  $P, Q$  are orthogonal matrices,  $\tilde{\Sigma} = \text{diag}(\tilde{\sigma}_1, \dots, \tilde{\sigma}_r)$ . Denote  $\tilde{U} = X_1 P$ ,  $\tilde{V} = Y_1 Q$ , and let

$$E = L_* \tilde{V} - \tilde{U} \tilde{\Sigma}, \quad F = L_*^T \tilde{U} - \tilde{V} \tilde{\Sigma}. \quad (26)$$

Then it follows that

$$\|\Sigma_1 - X_1^T L_* Y_1\| = \|X_1^T [\frac{1}{p'}\Pi_{\Omega_0}(M - S_0) - L_*] Y_1\| \leq \|\frac{1}{p'}\Pi_{\Omega_0}(M - S_0) - L_*\|. \quad (27)$$

Using (25) and (27), by calculations, we get

$$\begin{aligned} \|E\| &= \|L_* \tilde{V} - \tilde{U} \tilde{\Sigma}\| = \|L_* Y_1 - X_1 P \tilde{\Sigma} Q^T\| = \|L_* Y_1 - X_1 X_1^T L_* Y_1\| \\ &\leq \|L_* Y_1 - X_1 \Sigma_1\| + \|X_1 (\Sigma_1 - X_1^T L_* Y_1)\| \\ &= \|L_* Y_1 - \frac{1}{p'}\Pi_{\Omega_0}(M - S_0) Y_1\| + \|\Sigma_1 - X_1^T L_* Y_1\| \\ &\leq 2\|\frac{1}{p'}\Pi_{\Omega_0}(M - S_0) - L_*\| \leq 2(\xi + \gamma)\mu r\|L_*\|, \quad \text{w.p. } \geq 1 - 1/m^{10+\log \alpha}. \end{aligned} \quad (28)$$

Similarly, we get

$$\|F\| \leq 2(\xi + \gamma)\mu r\|L_*\|, \quad \text{w.p. } \geq 1 - 1/m^{10+\log \alpha}. \quad (29)$$

Next, we only need to show  $\max\{\|E\|, \|F\|\} \leq \sigma_{r*}$  and  $\|(I_m - \tilde{U}\tilde{U}^T)L_*(I_n - \tilde{V}\tilde{V}^T)\| < \tilde{\sigma}_r$ . Once these two inequalities hold, we may apply Lemma 4.

For the first inequality, using (28), (29) and the assumption  $(\xi + \gamma)\mu \kappa r < \frac{1}{6}$ , we get

$$\max\{\|E\|, \|F\|\} \leq 2(\xi + \gamma)\mu r\|L_*\| < \sigma_{r*}, \quad \text{w.p. } \geq 1 - 1/m^{10+\log \alpha}. \quad (30)$$

For the second inequality, using (23) and (24), we have

$$\left\| \frac{1}{p'} \Pi_{\Omega}(M - S_0) - L_* \right\| \leq \left\| \frac{1}{p'} \Pi_{\Omega}(L_*) - L_* \right\| + \frac{1}{p'} \|S_* - S_0\| \leq (\xi + \gamma) \mu r \|L_*\|. \quad (31)$$

Then using Lemma 2, (25), (27) and (31), we have

$$|\tilde{\sigma}_r - \sigma_{r*}| \leq |\tilde{\sigma}_r - \hat{\gamma}_{r,0}| + |\hat{\gamma}_{r,0} - \sigma_{r*}| \leq \|X_1^T L_* Y_1 - \Sigma_1\| + \left\| \frac{1}{p'} \Pi_{\Omega_0}(M - S_0) - L_* \right\| \leq 2(\xi + \gamma) \mu r \|L_*\|.$$

It follows that

$$\tilde{\sigma}_r \geq \sigma_{r*} - 2(\xi + \gamma) \mu r \|L_*\|. \quad (32)$$

Then using the assumption  $(\xi + \gamma) \mu \kappa r < \frac{1}{6}$ , (25) and (32), we have

$$\begin{aligned} \|(I_m - \tilde{U} \tilde{U}^T) L_* (I_n - \tilde{V} \tilde{V}^T)\| &= \|(I_m - X_1 X_1^T) [L_* - \frac{1}{p'} \Pi_{\Omega_0}(M - S_0)] (I_n - Y_1 Y_1^T)\| \\ &\leq \|L_* - \frac{1}{p'} \Pi_{\Omega_0}(M - S_0)\| \leq (\xi + \gamma) \mu r \|L_*\| < \sigma_{r*} - 2(\xi + \gamma) \mu r \|L_*\| \leq \tilde{\sigma}_r. \end{aligned}$$

Now using (28), (29), the assumption  $(\xi + \gamma) \mu \kappa r < \frac{1}{6}$  and Lemma 4, we have

$$\max\{\theta_{x,1}, \theta_{y,1}\} = \max\{\|\sin \Theta(U_*, \tilde{U})\|, \|\sin \Theta(V_*, \tilde{V})\|\} \leq \frac{2(\xi + \gamma) \mu r \kappa}{1 - 1/3} = 3(\xi + \gamma) \mu r \kappa, \quad (33a)$$

$$\|L_* - \tilde{U} \tilde{\Sigma} \tilde{V}^T\|_{\max} / \|L_*\| \leq (\|U_*\|_{2,\infty} \theta_{y,1} + \|V_*\|_{2,\infty} \theta_{x,1}) + (1 + 3\|U_*\|_{2,\infty} \|V_*\|_{2,\infty}) \theta_{x,1} \theta_{y,1}. \quad (33b)$$

Using the assumption  $(\xi + \gamma) \mu \kappa r < \frac{1}{3} \sqrt{\frac{\mu'_1 r}{m}}$ , by (33a), we have  $\max\{\theta_{x,1}, \theta_{y,1}\} \leq \sqrt{\frac{\mu'_1 r}{m}}$ . On the other hand, assumption (A1) implies that

$$\|U_*\|_{2,\infty} \leq \sqrt{\frac{\mu r}{m}}, \quad \|V_*\|_{2,\infty} \leq \sqrt{\frac{\mu r}{n}}. \quad (34)$$

Then it follows from Lemma 9 that

$$\|X_1\|_{2,\infty} \leq \|U_*\|_{2,\infty} + \|\sin \Theta(X_1, U_*)\| \leq \sqrt{\frac{\mu r}{m}} + \sqrt{\frac{\mu'_1 r}{m}} \leq \sqrt{\frac{\mu_1 r}{m}}, \quad (35a)$$

$$\|Y_1\|_{2,\infty} \leq \|V_*\|_{2,\infty} + \|\sin \Theta(Y_1, V_*)\| \leq \sqrt{\frac{\mu r}{n}} + \sqrt{\frac{\mu'_1 r}{m}} \leq \sqrt{\frac{\mu_1 r}{n}}. \quad (35b)$$

Using the assumption  $(\xi + \gamma) \mu \kappa r < \frac{1}{3} \sqrt{\frac{\mu'_1 r}{m}}$ , (25), (27), (33b), (34) and (35), by calculations, we have

$$\begin{aligned} \|L_* - X_1 \Sigma_1 Y_1^T\|_{\max} / \|L_*\| &\leq \|L_* - \tilde{U} \tilde{\Sigma} \tilde{V}^T\|_{\max} / \|L_*\| + \|\tilde{U} \tilde{\Sigma} \tilde{V}^T - X_1 \Sigma_1 Y_1^T\|_{\max} / \|L_*\| \\ &= \|L_* - \tilde{U} \tilde{\Sigma} \tilde{V}^T\|_{\max} / \|L_*\| + \|X_1 (X_1^T L_* Y_1 - \Sigma_1) Y_1^T\|_{\max} / \|L_*\| \\ &\leq \|L_* - \tilde{U} \tilde{\Sigma} \tilde{V}^T\|_{\max} / \|L_*\| + \|X_1\|_{2,\infty} \|X_1^T L_* Y_1 - \Sigma_1\| \|Y_1\|_{2,\infty} / \|L_*\| \\ &\leq \|L_* - \tilde{U} \tilde{\Sigma} \tilde{V}^T\|_{\max} / \|L_*\| + \|X_1\|_{2,\infty} \|Y_1\|_{2,\infty} (\xi + \gamma) \mu r \kappa, \\ &\leq (\|U_*\|_{2,\infty} \theta_{y,1} + \|V_*\|_{2,\infty} \theta_{x,1}) + (1 + 3\|U_*\|_{2,\infty} \|V_*\|_{2,\infty}) \theta_{x,1} \theta_{y,1} \\ &\quad + \|X_1\|_{2,\infty} \|Y_1\|_{2,\infty} \frac{1}{3} \sqrt{\frac{\mu'_1 r}{m}} \\ &\leq \left( \sqrt{\frac{\mu r}{m}} \theta_{y,1} + \sqrt{\frac{\mu r}{n}} \theta_{x,1} + \theta_{x,1} \theta_{y,1} \right) + \mathcal{O}(n^{-3/2}), \end{aligned}$$

which completes the proof.  $\square$



### 2.3 Proof of Theorem 3

**Proof of Theorem 3.** First, we give an upper bound for  $\sup_{X \in \mathbb{R}^{m \times r}} \|\Pi_{\Omega_t}(R)\Pi_{\Omega_t}(XY_t^T)^T\|/\|X\|$ . Let  $\{\delta_{ij}\}$  be an independent family of BERNOLLI( $p'$ ) random variables,  $X^T = [x_1, \dots, x_m] \in \mathbb{R}^{r \times m}$  be arbitrary nonzero matrix with  $\|X\| = 1$ , and  $Y_t^T = [y_1, \dots, y_n]$ . Denote  $E_{ij} = e_i e_j^T$ ,  $R = [r_{ij}]$ ,  $\mathbf{W}_{il} = \sum_{j,k} \delta_{ij} r_{ij} E_{ij} \delta_{lk} x_k^T y_l E_{kl}^T$ ,  $\mathbf{Z} = \sum_{i,l} \mathbf{Z}_{i,l}$ . By calculations, we have

$$\begin{aligned} \mathbb{E}(\mathbf{W}_{il}) &= p'^2 \sum_{j,k} r_{ij} E_{ij} y_k^T x_l E_{kl} = p'^2 \sum_j r_{ij} E_{ij} y_j^T x_l E_{jl} = p'^2 R_{(i,:)} Y_t x_l E_{il} = 0, \\ \|\mathbf{W}_{il}\| &\leq \sqrt{p'n} \max |r_{ij} x_j^T y_l| \leq \sqrt{\mu' r p'} \|R\|_{\max}, \\ \mathbb{E}[\sum_{i,l} \mathbf{W}_{il} \mathbf{W}_{il}^T] &= \mathbb{E}[\sum_{i,l} (\sum_{j,k} \delta_{ij} r_{ij} E_{ij} \delta_{lk} x_k^T y_l E_{kl}^T) (\sum_{j',k'} \delta_{ij'} r_{ij'} E_{ij'} \delta_{lk'} x_{k'}^T y_l E_{k'l}^T)^T] = 0, \\ \mathbb{E}[\sum_{i,l} \mathbf{W}_{il}^T \mathbf{W}_{il}] &= 0. \end{aligned}$$

By Lemma 5, we have  $\mathbb{P}\{\|\mathbf{W}\| > t\} \leq (m+n) \exp\left(-\frac{3t/2}{\sqrt{\mu' r p'} \|R\|_{\max}}\right)$ . Let  $t = \frac{2}{3}(\log(m+n) + 5)\sqrt{\mu' r p'} \|R\|_{\max}$ , then w.p.  $\geq 0.99$ , it holds

$$\|\mathbf{W}\| \leq \frac{2}{3}(\log(m+n) + 5)\sqrt{\mu' r p'} \|R\|_{\max}. \quad (36)$$

Second, It is easy to see that  $X_{\text{opt}} = (M - S_t)Y_t$ . By calculations, we have

$$\begin{aligned} &\min_X \|\Pi_{\Omega_t}(XY_t^T) - \Pi_{\Omega_t}(M - S_t)\|^2 \\ &= \min_{\Delta X} \|\Pi_{\Omega_t}((X_{\text{opt}} + \Delta X)Y_t^T) - \Pi_{\Omega_t}((M - S_t)Y_t Y_t^T + (M - S_t)(I - Y_t Y_t^T))\|^2 \\ &= \min_{\Delta X} \|\Pi_{\Omega_t}(\Delta X Y_t^T) - \Pi_{\Omega_t}(R)\|^2. \end{aligned} \quad (37)$$

$$\quad (38)$$

Then we declare that (38) is minimized when  $\Delta X = \tilde{X}_{\text{opt}} - X_{\text{opt}}$ . This is because (37) is minimized when  $X = \tilde{X}_{\text{opt}}$  and  $X = X_{\text{opt}} + \Delta X$ . Thus, we have

$$\|\tilde{X}_{\text{opt}} - X_{\text{opt}}\| = \|\Delta X\| \leq \frac{\sup_{X \in \mathbb{R}^{m \times r}} \|\Pi_{\Omega_t}(R)\Pi_{\Omega_t}(XY_t^T)^T\|}{\sigma^2}. \quad (39)$$

Substituting (36) into (39), we get the conclusion.  $\square$

### 2.4 Proof of Theorem 4

**Lemma 13.** Denote  $r_s = \inf_t \frac{\|S_t - S_*\|_F^2}{\|S_t - S_*\|^2}$ ,  $\zeta = \sqrt{\frac{2s\mu r}{mr_s}}$ . If  $\|L_* - X_t \Sigma_t Y_t^T\|_{\max} \leq c_t \|L_*\| \sqrt{\frac{\mu r}{m}}$  for some positive parameter  $c_t$ , then

$$\|S_t - S_*\| \leq 2c_t \|L_*\| \zeta, \quad |\gamma_{j,t} - \sigma_{j*}| \leq 2c_t \|L_*\| \zeta.$$

*Proof.* Using Lemma 11, by simple calculations, we have

$$\|S_t - S_*\| \leq \frac{\|S_t - S_*\|_F}{\sqrt{r_s}} \leq \sqrt{\frac{2s}{r_s}} \|S_t - S_*\|_{\max} \leq 2\sqrt{\frac{2s}{r_s}} \|\Pi_{\Omega}(L_* - X_t \Sigma_t Y_t^T)\|_{\max} \leq 2c_t \|L_*\| \sqrt{\frac{2s\mu r}{mr_s}} = 2c_t \|L_*\| \zeta.$$

Then by Lemma 2, we know that

$$|\gamma_{j,t} - \sigma_{j*}| \leq \|(M - S_t) - L_*\| = \|S_t - S_*\| \leq 2c_t \|L_*\| \zeta.$$

The proof is completed.  $\square$

**Proof of Theorem 4.** First, denote  $\bar{X}_{t+1} = (M - S_t)Y_t$ , then we know that  $\bar{X}_{t+1}$  is the solution to  $\min_X \|M - S_t - XY_t^T\|$ . Also note that  $\tilde{X}_{t+1}$  on line 8 of Algorithm 1 is the solution to  $\min_X \|\Pi_{\Omega_t}(M - S_t - XY_t^T)\|$ . Then by Theorem 3, we have

$$\|\bar{X}_{t+1} - \tilde{X}_{t+1}\| \leq C_{\text{LS}}\|(M - S_t)(I - Y_t Y_t^T)\|_{\max}, \quad \text{w.p.} \geq 0.99.$$

Then it follows that from Lemma 1, Lemma 11 and Lemma 13 that

$$\begin{aligned} \|\bar{X}_{t+1} - \tilde{X}_{t+1}\| &\leq C_{\text{LS}}(\|L_*(I - Y_t Y_t^T)\|_{\max} + \|(S_t - S_*)(I - Y_t Y_t^T)\|_{\max}) \\ &\leq C_{\text{LS}}(\|L_*\|\sqrt{\frac{\mu r}{m}}\theta_{y,t} + \|S_t - S_*\|_{2,\infty}) \leq C_{\text{LS}}(\|L_*\|\sqrt{\frac{\mu r}{m}}\theta_{y,t} + \sqrt{2p\varrho n}\|S_t - S_*\|_{\max}) \\ &\leq C_{\text{LS}}(\|L_*\|\sqrt{\frac{\mu r}{m}}\theta_{y,t} + 2\sqrt{2p\varrho n}\|L_* - X_t \Sigma_t Y_t^T\|_{\max}) \leq \frac{C}{\sqrt{m}}\|L_*\|\theta_{y,t}. \end{aligned} \quad (40)$$

Second, using Lemma 13 and  $4c\kappa\zeta < 1$ , we have

$$\|S_t - S_*\| < 2c\theta_{y,t}\|L_*\|\zeta \leq \sqrt{2}c\|L_*\|\zeta < \frac{\sigma_{r*}}{\sqrt{2}} \leq \sigma_{r*}\sqrt{1 - \theta_{y,t}^2}, \quad (41)$$

Then by Lemma 8, we know that

$$\|\sin \Theta(\bar{X}_{t+1}, U_*)\| \leq \frac{\|S_t - S_*\|}{\sigma_{r*}\sqrt{1 - \theta_{y,t}^2} - \|S_t - S_*\|}. \quad (42)$$

Using (42), the assumption  $\|L_* - X_t \Sigma_t Y_t^T\|_{\max} \leq c\|L_*\|\theta_{y,t}\sqrt{\frac{\mu r}{m}}$ , Lemma 13 and  $\theta_{y,t} \leq \frac{1}{\sqrt{2}}$ , we get

$$\|\sin \Theta(\bar{X}_{t+1}, U_*)\| \leq \frac{2c\|L_*\|\zeta\theta_{y,t}}{\frac{\sigma_{r*}}{\sqrt{2}} - 2c\|L_*\|\zeta\theta_{y,t}} \leq \frac{2\sqrt{2}c\kappa\zeta\theta_{y,t}}{1 - 2c\kappa\zeta} < 4\sqrt{2}c\kappa\zeta\theta_{y,t}. \quad (43)$$

Therefore, using Lemma 1, (40) and (43), we have

$$\begin{aligned} \|\theta_{x,t+1}\| &= \|U_{*,c}^T X_{t+1}\| = \|U_{*,c}^T \tilde{X}_{t+1} R_{x,t+1}^{-1}\| \leq \|U_{*,c}^T \bar{X}_{t+1} R_{x,t+1}^{-1}\| + \|U_{*,c}^T (\tilde{X}_{t+1} - \bar{X}_{t+1}) R_{x,t+1}^{-1}\| \\ &\leq \|R_{x,t+1}^{-1}\|(\|\sin \Theta(\bar{X}_{t+1}, U_*)\|\|\bar{X}_{t+1}\| + \|\tilde{X}_t - \bar{X}_t\|) \\ &\leq \frac{1}{\sigma_r(\tilde{X}_{t+1})} \left( 4\sqrt{2}c\kappa\zeta\|\bar{X}_{t+1}\| + \frac{C}{\sqrt{m}}\|L_*\| \right) \theta_{y,t}. \end{aligned} \quad (44)$$

Now using Lemma 2, (40),  $\theta_{y,t} \leq \frac{1}{\sqrt{2}}$  and (41), we have

$$\begin{aligned} \|\bar{X}_{t+1}\| &= \|(M - S_t)Y_t\| \leq \|L_* Y_t\| + \|S_t - S_*\| \leq \|L_*\| + \sqrt{2}c\|L_*\|\zeta, \\ \sigma_r(\tilde{X}_{t+1}) &\geq \sigma_r(\bar{X}_{t+1}) - \frac{C}{\sqrt{m}}\|L_*\|\theta_{y,t} \geq \sigma_r((M - S_t)Y_t) - \frac{C}{\sqrt{2m}}\|L_*\| \geq \sigma_r(L_* Y_t) - \|S_t - S_*\| - \frac{C}{\sqrt{2m}}\|L_*\| \\ &\geq \sigma_{r*}\sqrt{1 - \theta_{y,t}^2} - \sqrt{2}c\|L_*\|\zeta - \frac{C}{\sqrt{2m}}\|L_*\| \geq \frac{\sigma_{r*}}{\sqrt{2}} - \sqrt{2}c\|L_*\|\zeta - \frac{C}{\sqrt{2m}}\|L_*\|. \end{aligned}$$

Substituting them into (44), we get the conclusion.  $\square$

## 2.5 Proof of Theorem 5

**Lemma 14.** Follow the notations and assumptions in Lemma 1. Then

$$\|L_* - \hat{X}_{t+1} R_{x,t+1} Y_t^T\|_{\max} \leq \left( (1 + C_{\text{LS}}\sqrt{\frac{\mu' r}{n}})\sqrt{\frac{\mu r}{m}} + (1 + C_{\text{LS}}\sqrt{2p\varrho n})\sqrt{\frac{\mu' r}{n}}2c\zeta \right) \|L_*\|\theta_{y,t}.$$

*Proof.* Direct calculations give rise to

$$\begin{aligned} \|L_* - \tilde{X}_{t+1}Y_t^T\|_{\max} &\leq \|L_* - (M - S_t)Y_tY_t^T\|_{\max} + \|(M - S_t)Y_tY_t^T - \tilde{X}_{t+1}Y_t^T\|_{\max} \\ &\leq \|L_* - (M - S_t)Y_tY_t^T\|_{\max} + \|(M - S_t)Y_t - \tilde{X}_{t+1}\| \sqrt{\frac{\mu'r}{n}} \end{aligned} \quad (45a)$$

$$\leq \|L_* - (M - S_t)Y_tY_t^T\|_{\max} + C_{\text{LS}} \sqrt{\frac{\mu'r}{n}} \|(M - S_t)(I - Y_tY_t^T)\|_{\max} \quad (45b)$$

$$\begin{aligned} &\leq (1 + C_{\text{LS}} \sqrt{\frac{\mu'r}{n}}) \|L_*(I - Y_tY_t^T)\|_{\max} + (1 + C_{\text{LS}} \sqrt{2\varrho pn}) \sqrt{\frac{\mu'r}{n}} \|S_t - S_*\|_{\max} \\ &\leq \left( (1 + C_{\text{LS}} \sqrt{\frac{\mu'r}{n}}) \sqrt{\frac{\mu r}{m}} + (1 + C_{\text{LS}} \sqrt{2\varrho pn}) \sqrt{\frac{\mu'r}{n}} 2c\zeta \right) \|L_*\| \theta_{y,t} \end{aligned} \quad (45c)$$

where (45a) uses  $\|Y_t\|_{2,\infty} \leq \sqrt{\frac{\mu'r}{m}}$ , (45b) uses Theorem 3, (45c) uses the SVD of  $L_*$ ,  $\|U_*\|_{2,\infty} \leq \sqrt{\frac{\mu r}{m}}$  and Lemme 1.  $\square$

**Proof of Theorem 5.** First, by Lemma 7, we have

$$\|M - S_t - X_t \Sigma_t Y_t^T\| \geq \sigma_{r*} \max\{\sqrt{1 - \theta_{x,t}^2} \theta_{y,t}, \sqrt{1 - \theta_{y,t}^2} \theta_{x,t}\} \sqrt{1 - \theta_{x,t}^2} \sqrt{1 - \theta_{y,t}^2} - \|S_t - S_*\|$$

Then using (41),  $\theta_{x,t} \leq \frac{1}{\sqrt{2}}$  and  $\theta_{y,t} \leq \frac{1}{\sqrt{2}}$ , we get

$$\|M - S_t - X_t \Sigma_t Y_t^T\| \geq \frac{\sigma_{r*}}{2\sqrt{2}} \theta_{y,t} - 2c \|L_*\| \sqrt{\frac{\mu r}{m}} \theta_{y,t}. \quad (46)$$

Second, by calculations, we have

$$\begin{aligned} \|M - S_t - \hat{X}_{t+1} \tilde{Y}_{t+1}^T\| &\leq \|(I - \hat{X}_{t+1} \hat{X}_{t+1}^T)(M - S_t)\| + \|\hat{X}_{t+1} \hat{X}_{t+1}^T(M - S_t) - \hat{X}_{t+1} \tilde{Y}_{t+1}^T\| \\ &\leq \|(I - \hat{X}_{t+1} \hat{X}_{t+1}^T)L_*\| + \|S_t - S_*\| + \|\hat{X}_{t+1}^T(M - S_t) - \tilde{Y}_{t+1}^T\| \\ &\leq \|L_*\| \theta_{x,t+1} + 2c \|L_*\| \zeta \sqrt{\frac{\mu r}{m}} \theta_{x,t+1} + \frac{C}{\sqrt{m}} \|L_*\| \theta_{x,t+1} \end{aligned} \quad (47)$$

$$\leq (1 + 2c\zeta \sqrt{\frac{\mu r}{m}} + \frac{C}{\sqrt{m}}) \phi \|L_*\| \theta_{y,t}, \quad (48)$$

where the first two terms of (47) use Lemma 1 and (41), respectively, and the last term can be obtained similar to (40), with the help of Lemma 14.

Then it follows that

$$\|M - S_{t+1} - X_{t+1} \Sigma_{t+1} Y_{t+1}^T\| \leq \|M - S_t - X_{t+1} \Sigma_{t+1} Y_{t+1}^T\| \quad (49a)$$

$$\leq (1 + 2c \sqrt{\frac{\mu r}{m}} + \frac{C}{\sqrt{m}}) \phi \|L_*\| \theta_{y,t} \quad (49b)$$

$$\begin{aligned} &\leq \frac{(1 + 2c\zeta \sqrt{\frac{\mu r}{m}} + \frac{C}{\sqrt{m}}) \phi \|L_*\|}{\frac{\sigma_{r*}}{2\sqrt{2}} - 2c\zeta \|L_*\| \sqrt{\frac{\mu r}{m}}} \|M - S_t - X_t \Sigma_t Y_t^T\| \\ &= \psi \|M - S_t - X_t \Sigma_t Y_t^T\|, \end{aligned} \quad (49c)$$

where (49a) uses Lemma 6, (49b) uses (48), (49c) uses (46). The proof is completed.  $\square$

## References

Chandler Davis and William Morton Kahan. The rotation of eigenvectors by a perturbation. III. *SIAM J. Numer. Anal.*, 7(1):1–46, 1970.

- 
- Prateek Jain and Praneeth Netrapalli. Fast exact matrix completion with finite samples. In *Proceedings of The 28th Conference on Learning Theory (COLT)*, pages 1007–1034, Paris, France, 2015.
- Gilbert W Stewart and Ji-Guang Sun. *Matrix Perturbation Theory*. Academic Press, Boston, 1990.
- Joel A. Tropp. An introduction to matrix concentration inequalities. *Foundations and Trends® in Machine Learning*, 8(1-2):1–230, 2015. ISSN 1935-8237. doi: 10.1561/22000000048. URL <http://dx.doi.org/10.1561/22000000048>.
